# Supplementary material
Source: MDPI journal article supplement (https://www.mdpi.com/2673-4672/3/4/33)
Supplement: s1 [file s1]

**Table S1.** Statistical assessment of hourly average PurpleAir PM<sub>2.5</sub> at selected sites for the years 2016 and 2022 at FEM/FRM

| Site Name and<br>AQS ID, POC          | PurpleAir<br>Sensor<br>Index | Distance,<br>mts | Dates Duration                | Num. of<br>Paired<br>Observation | R <sup>2</sup> | Mean<br>Bias<br>(µg/m <sup>3</sup> ) | RMSE  |
|---------------------------------------|------------------------------|------------------|-------------------------------|----------------------------------|----------------|--------------------------------------|-------|
| Thousand Oaks<br>061110007, 3         | 12741                        | 0.14             | 9 Jul 2018 to 10<br>Nov 2021  | 20,905                           | 0.61           | 3.99                                 | 7.93  |
| Arroyo Grande<br>060792007, 1         | 16741                        | 7.16             | 29 Sep 2018 to<br>14 May 2022 | 21,257                           | 0.28           | 2.47                                 | 10.48 |
| Arroyo Grande<br>060792007, 1         | 6816                         | 9.51             | 30 Jan 2018 to<br>6 Jan 2019  | 4,861                            | 0.23           | 3.24                                 | 11.42 |
| Bishop-Line<br>060270002, 1           | 17107                        | 7.89             | 2 Oct 2018 to<br>8 Oct 2021   | 22,099                           | 0.83           | -1.9                                 | 9.89  |
| Corcoran<br>060310004, 8              | 104104                       | 6.78             | 14 Apr 2021 to<br>30 Jun 2022 | 6,690                            | 0.69           | 10.25                                | 18.94 |
| El Rio-Rio Mesa<br>Schl. 061113001, 3 | 9594                         | 0.18             | 2 Apr 2018 to<br>31 Aug 2022  | 30,798                           | 0.5            | 3.5                                  | 7.85  |
| Fresno-Garland<br>060190011, 3        | 22305                        | 6.62             | 13 Dec 2018 to<br>17 Jan 2021 | 16,222                           | 0.8            | 6.19                                 | 13.16 |
| Fresno-Garland<br>060190011, 3        | 2358                         | 1.87             | 31 Jul 2017 to<br>9 Dec 2019  | 17,194                           | 0.83           | 5.71                                 | 11.85 |
| Fresno-Garland<br>060190011, 3        | 6558                         | 8.68             | 25 Jan 2018 to<br>12 Dec 2018 | 3,729                            | 0.85           | 2.96                                 | 9.28  |
| Fresno-Garland<br>060190011, 4        | 22305                        | 6.62             | 13 Dec 2018 to<br>31 Dec 2020 | 15,893                           | 0.81           | 5.38                                 | 12.46 |
| Fresno-Garland<br>060190011, 4        | 2358                         | 1.87             | 31 Jul 2017 to<br>9 Dec 2019  | 17,016                           | 0.83           | 6.98                                 | 12.58 |
| Fresno-Garland<br>060190011, 4        | 6558                         | 8.68             | 25 Jan 2018 to<br>12 Dec 2018 | 3,739                            | 0.85           | 6.6                                  | 10.72 |
| Goleta-Fairview<br>060832011, 1       | 16705                        | 0                | 29 Sep 2018 to<br>30 Jun 2022 | 28,532                           | 0.56           | 3.44                                 | 6.93  |
| Hanford<br>060311004, 3               | 104246                       | 17.59            | 15 Apr 2021 to<br>30 Jun 2022 | 6,578                            | 0.73           | 10.61                                | 18.6  |
| Lancaster<br>060379033, 1             | 8290                         | 18.28            | 8 Mar 2018 to<br>24 Aug 2020  | 18,658                           | 0.51           | 0.03                                 | 5.64  |
| Lancaster<br>060379033, 1             | 8306                         | 18.28            | 8 Mar 2018 to<br>30 Jun 2022  | 11,712                           | 0.51           | -1.2                                 | 6.58  |
| Long Beach<br>060374008, 3            | 104940                       | 6.63             | 24 Apr 2021 to<br>14 Mar 2022 | 7,501                            | 0.62           | 3.37                                 | 9.25  |
| Long Beach<br>060374008, 3            | 5016                         | 2.53             | 28 Nov 2017 to<br>14 Mar 2022 | 27,090                           | 0.55           | 3.52                                 | 9.98  |
| Lompoc<br>060832004, 1                | 16703                        | 0                | 29 Sep 2018 to<br>30 Jun 2022 | 28,482                           | 0.6            | 2.14                                 | 6.21  |

|                               |        |       |                               |        |      |       |       |
|-------------------------------|--------|-------|-------------------------------|--------|------|-------|-------|
| Madera<br>060392010, 3        | 104254 | 1.58  | 9 Jul 2021 to 30<br>Apr 2022  | 5,205  | 0.67 | 12.76 | 18.14 |
| Manteca<br>060772010, 3       | 104108 | 5.87  | 14 Apr 2021 to<br>12 Feb 2022 | 2,090  | 0.67 | 13.01 | 20.32 |
| Merced<br>060470003, 3        | 104208 | 7.42  | 15 Apr 2021 to<br>24 Jan 2022 | 2,181  | 0.7  | 15.67 | 21.23 |
| Mammoth Lakes<br>060510001, 6 | 17105  | 11.32 | 20 Dec 2018 to<br>31 May 2019 | 3,793  | 0.9  | -0.16 | 5.64  |
| Modesto<br>060990005, 3       | 13489  | 4.23  | 18 Jul 2018 to<br>30 Jun 2022 | 10,267 | 0.75 | 1.26  | 11.64 |
| Modesto<br>060990005, 3       | 2368   | 0.58  | 31 Jul 2017 to<br>30 Jun 2022 | 27,836 | 0.83 | 3.67  | 9.83  |
| Ojai<br>061111004, 3          | 48393  | 0.35  | 26 Feb 2020 to<br>31 Aug 2022 | 20,756 | 0.55 | 1.82  | 6.05  |
| Ontario<br>060710027, 3       | 5276   | 12.43 | 8 Jun 2018 to 9<br>Mar 2022   | 12,983 | 0.67 | 1.65  | 8.54  |
| Piru<br>061110009, 3          | 12288  | 6.84  | 28 Jun 2018 to<br>2 Aug 2022  | 27,803 | 0.54 | 1.52  | 6.52  |
| San Jose<br>060850005, 3      | 146592 | 9.91  | 13 Apr 2022 to<br>18 Aug 2022 | 2,753  | 0.25 | -3.86 | 5.74  |
| Simi Valley<br>061112002, 3   | 12743  | 0.64  | 9 Jul 2018 to 31<br>Aug 2022  | 30,151 | 0.66 | 2.6   | 7.03  |
| Simi Valley<br>061112002, 4   | 12743  | 0.64  | 9 Jul 2018 to 31<br>Aug 2022  | 30,108 | 0.64 | 3.11  | 7.32  |
| Santa Maria<br>060831008, 3   | 16701  | 3.34  | 29 Sep 2018 to<br>4 Feb 2021  | 16,931 | 0.63 | 2.78  | 7.14  |
| Stockton<br>060771002, 3      | 44707  | 19.61 | 20 Dec 2019 to<br>1 Nov 2021  | 5,393  | 0.45 | 2.48  | 12.73 |
| Stockton<br>060771002, 4      | 44707  | 19.61 | 20 Jan 2020 to<br>20 Feb 2020 | 717    | 0.29 | 19.76 | 24.45 |
| Victorville<br>060710306, 1   | 8338   | 15.16 | 8 Mar 2018 to<br>30 Jun 2022  | 34,918 | 0.4  | -1.55 | 7.25  |
| Victorville<br>060710306, 2   | 8338   | 15.16 | 8 Mar 2018 to<br>30 Jun 2022  | 34,655 | 0.44 | -1.98 | 6.95  |

**Table S2.** Statistical assessment of hourly average PurpleAir PM<sub>2.5</sub> at selected sites for the years 2016 and 2022 at non-FEM/FRM sites

| Site Name and<br>AQS ID, POC          | PurpleAir<br>Sensor<br>Index | Distance,<br>mts | Dates<br>Duration             | Num. of<br>Paired<br>Observation | R <sup>2</sup> | Mean<br>Bias<br>(µg/m <sup>3</sup> ) | RMSE |
|---------------------------------------|------------------------------|------------------|-------------------------------|----------------------------------|----------------|--------------------------------------|------|
| Bakersfield<br>060290014, 3           | 13473                        | 0.6              | 18 Jul 2018 to<br>25 Oct 2021 | 3,531                            | 0.76           | 3.1                                  | 9.4  |
| Bakersfield<br>060290014, 3           | 2350                         | 0.6              | 31 Jul 2017 to<br>8 Mar 2022  | 34,583                           | 0.73           | 4.3                                  | 11.7 |
| Calexico-Ethel<br>Street 060250005, 3 | 1174                         | 0.0              | 24 Oct 2017 to<br>19 Feb 2018 | 2,486                            | 0.89           | 3.5                                  | 11.6 |
| Eureka-Humboldt<br>Hill 060231005, 1  | 12929                        | 15.9             | 31 Jul 2018 to<br>31 Dec 2018 | 2,717                            | 0.27           | 1.1                                  | 15.1 |
| Riverside<br>060658001, 9             | 1854                         | 8.5              | 10 Jul 2017 to<br>31 Dec 2019 | 14,604                           | 0.69           | 5.7                                  | 9.7  |
| Riverside<br>060658001, 9             | 2612                         | 9.0              | 7 Aug 2017 to<br>31 Dec 2019  | 19,132                           | 0.73           | 4.6                                  | 9.0  |
| Riverside<br>060658001, 9             | 4731                         | 11.2             | 22 Nov 2017<br>to 1 Mar 2019  | 5,686                            | 0.76           | 5.2                                  | 9.7  |
| Riverside<br>060658001, 9             | 4748                         | 10.3             | 22 Nov 2017<br>to 31 Dec 2019 | 12,614                           | 0.72           | 4.4                                  | 8.6  |
| Riverside<br>060658001, 9             | 5280                         | 14.8             | 12 Dec 2017 to<br>31 Dec 2019 | 13,888                           | 0.73           | 4.4                                  | 8.6  |
| Riverside<br>060658001, 9             | 5284                         | 17.2             | 12 Dec 2017 to<br>31 Dec 2019 | 13,815                           | 0.73           | 3.8                                  | 8.1  |
| Riverside<br>060658001, 9             | 6806                         | 18.4             | 30 Jan 2018 to<br>31 Dec 2019 | 11,599                           | 0.68           | 5.0                                  | 9.0  |
| Sacramento-T<br>Street 060670010, 3   | 1208                         | 11.9             | 18 Jul 2018 to<br>25 Oct 2021 | 536                              | 0.65           | 4.6                                  | 7.6  |
| Sacramento-T<br>Street 060670010, 3   | 13369                        | 13.1             | 31 Jul 2017 to<br>8 Mar 2022  | 8,824                            | 0.79           | 4.6                                  | 11.6 |
| Sacramento-T<br>Street 060670010, 3   | 13373                        | 13.1             | 24 Oct 2017 to<br>19 Feb 2018 | 8,909                            | 0.80           | 4.1                                  | 11.2 |
| Sacramento-T<br>Street 060670010, 3   | 13391                        | 13.1             | 31 Jul 2018 to<br>31 Dec 2018 | 8,896                            | 0.82           | 4.2                                  | 11.0 |
| Sacramento-T<br>Street 060670010, 3   | 13413                        | 13.1             | 10 Jul 2017 to<br>31 Dec 2019 | 8,801                            | 0.79           | 3.6                                  | 9.2  |
| Sacramento-T<br>Street 060670010, 3   | 13421                        | 13.1             | 7 Aug 2017 to<br>31 Dec 2019  | 8,881                            | 0.80           | 3.9                                  | 10.5 |
| Sacramento-T<br>Street 060670010, 3   | 13447                        | 13.1             | 22 Nov 2017<br>to 1 Mar 2019  | 9,412                            | 0.80           | 3.9                                  | 10.7 |
| Sacramento-T<br>Street 060670010, 3   | 16599                        | 13.1             | 22 Nov 2017<br>to 31 Dec 2019 | 8,897                            | 0.80           | 3.9                                  | 10.4 |

|                     |       |      |                |       |      |     |      |
|---------------------|-------|------|----------------|-------|------|-----|------|
| Sacramento-T        |       |      | 12 Dec 2017 to |       |      |     |      |
| Street 060670010, 3 | 16603 | 13.1 | 31 Dec 2019    | 8,830 | 0.80 | 3.8 | 11.0 |
| Sacramento-T        |       |      | 12 Dec 2017 to |       |      |     |      |
| Street 060670010, 3 | 16605 | 13.1 | 31 Dec 2019    | 8,911 | 0.81 | 4.1 | 11.3 |
| Sacramento-T        |       |      | 20 Oct 2017 to |       |      |     |      |
| Street 060670010, 3 | 16619 | 13.1 | 16 Nov 2017    | 8,896 | 0.79 | 4.3 | 11.4 |
| Sacramento-T        |       |      | 17 Jul 2018 to |       |      |     |      |
| Street 060670010, 3 | 16627 | 13.1 | 1 Sep 2020     | 8,922 | 0.80 | 3.9 | 10.6 |
| Sacramento-T        |       |      | 17 Jul 2018 to |       |      |     |      |
| Street 060670010, 3 | 16633 | 13.1 | 1 Sep 2020     | 8,943 | 0.80 | 4.4 | 11.6 |
| Sacramento-T        |       |      | 17 Jul 2018 to |       |      |     |      |
| Street 060670010, 3 | 16639 | 13.1 | 31 Aug 2020    | 8,874 | 0.79 | 4.1 | 11.2 |
| Sacramento-T        |       |      | 17 Jul 2018 to |       |      |     |      |
| Street 060670010, 3 | 16643 | 13.1 | 1 Sep 2020     | 8,986 | 0.80 | 4.1 | 10.7 |
| Sacramento-T        |       |      | 17 Jul 2018 to |       |      |     |      |
| Street 060670010, 3 | 16645 | 13.1 | 1 Sep 2020     | 9,191 | 0.80 | 3.9 | 10.9 |
| Sacramento-T        |       |      | 8 Nov 2018 to  |       |      |     |      |
| Street 060670010, 3 | 18819 | 2.8  | 4 Sep 2020     | 1,543 | 0.81 | 7.2 | 20.9 |
| Sacramento-T        |       |      | 7 Jul 2020 to  |       |      |     |      |
| Street 060670010, 3 | 18825 | 5.2  | 4 Sep 2020     | 1,371 | 0.84 | 8.0 | 20.8 |
| Sacramento-T        |       |      | 8 Nov 2018 to  |       |      |     |      |
| Street 060670010, 3 | 18827 | 4.6  | 28 Aug 2020    | 1,117 | 0.79 | 6.9 | 21.8 |
| Sacramento-T        |       |      | 8 Nov 2018 to  |       |      |     |      |
| Street 060670010, 3 | 18835 | 9.8  | 27 Aug 2020    | 1,190 | 0.80 | 5.0 | 18.9 |
| Sacramento-T        |       |      | 8 Nov 2018 to  |       |      |     |      |
| Street 060670010, 3 | 18851 | 8.8  | 27 Aug 2020    | 1,352 | 0.79 | 4.6 | 17.8 |
| Sacramento-T        |       |      | 8 Nov 2018 to  |       |      |     |      |
| Street 060670010, 3 | 18857 | 11.0 | 27 Aug 2020    | 1,351 | 0.79 | 4.2 | 17.5 |
| Sacramento-T        |       |      | 8 Nov 2018 to  |       |      |     |      |
| Street 060670010, 3 | 18865 | 9.3  | 26 Aug 2020    | 1,422 | 0.79 | 4.3 | 18.4 |
| Sacramento-T        |       |      | 8 Nov 2018 to  |       |      |     |      |
| Street 060670010, 3 | 18869 | 3.7  | 27 Aug 2020    | 1,442 | 0.78 | 3.5 | 16.8 |
| Sacramento-T        |       |      | 8 Nov 2018 to  |       |      |     |      |
| Street 060670010, 3 | 18871 | 10.3 | 26 Aug 2020    | 1,435 | 0.79 | 4.5 | 17.1 |
| Sacramento-T        |       |      | 8 Nov 2018 to  |       |      |     |      |
| Street 060670010, 3 | 18873 | 3.1  | 26 Aug 2020    | 1,419 | 0.79 | 3.3 | 16.1 |
| Sacramento-T        |       |      | 8 Nov 2018 to  |       |      |     |      |
| Street 060670010, 3 | 18879 | 10.3 | 20 Aug 2020    | 1,469 | 0.78 | 2.0 | 9.2  |
| Sacramento-T        |       |      | 11 Dec 2018 to |       |      |     |      |
| Street 060670010, 3 | 21613 | 5.5  | 25 Jun 2020    | 3,548 | 0.77 | 2.3 | 6.9  |
| Sacramento-T        |       |      | 11 Dec 2018 to |       |      |     |      |
| Street 060670010, 3 | 21651 | 5.5  | 19 Jun 2020    | 3,405 | 0.77 | 2.5 | 7.1  |
| Sacramento-T        |       |      | 11 Dec 2018 to |       |      |     |      |
| Street 060670010, 3 | 21667 | 5.5  | 11 Dec 2018 to | 3,329 | 0.79 | 2.1 | 6.2  |

|                     |       |      |                |        |      |      |      |
|---------------------|-------|------|----------------|--------|------|------|------|
| Street 060670010, 3 |       |      | 19 Jun 2020    |        |      |      |      |
| Sacramento-T        |       |      | 11 Dec 2018 to |        |      |      |      |
| Street 060670010, 3 | 21681 | 5.5  | 19 Jun 2020    | 3,291  | 0.79 | 2.2  | 6.3  |
| Sacramento-T        |       |      | 11 Dec 2018 to |        |      |      |      |
| Street 060670010, 3 | 21683 | 5.5  | 19 Jun 2020    | 3,336  | 0.77 | 2.7  | 7.1  |
| Sacramento-T        |       |      | 11 Dec 2018 to |        |      |      |      |
| Street 060670010, 3 | 21691 | 5.5  | 19 Jun 2020    | 3,386  | 0.77 | 2.2  | 6.8  |
| Sacramento-T        |       |      | 11 Dec 2018 to |        |      |      |      |
| Street 060670010, 3 | 21734 | 5.5  | 7 Jul 2020     | 3,868  | 0.72 | 2.3  | 6.7  |
| Sacramento-T        |       |      | 11 Dec 2018 to |        |      |      |      |
| Street 060670010, 3 | 21741 | 5.5  | 19 Jun 2020    | 2,356  | 0.56 | -0.7 | 5.3  |
| Sacramento-T        |       |      | 11 Dec 2018 to |        |      |      |      |
| Street 060670010, 3 | 21743 | 5.5  | 19 Jun 2020    | 3,363  | 0.79 | 2.7  | 6.7  |
| Sacramento-T        |       |      | 11 Dec 2018 to |        |      |      |      |
| Street 060670010, 3 | 21753 | 5.5  | 25 Jun 2020    | 3,518  | 0.76 | 2.8  | 7.8  |
| Sacramento-T        |       |      | 11 Dec 2018 to |        |      |      |      |
| Street 060670010, 3 | 21767 | 5.5  | 19 Jun 2020    | 3,333  | 0.78 | 2.1  | 6.3  |
| Sacramento-T        |       |      | 11 Dec 2018 to |        |      |      |      |
| Street 060670010, 3 | 21787 | 5.5  | 25 Jun 2020    | 3,558  | 0.77 | 2.4  | 6.8  |
| Sacramento-T        |       |      | 11 Dec 2018 to |        |      |      |      |
| Street 060670010, 3 | 21792 | 5.5  | 19 Jun 2020    | 3,310  | 0.79 | 2.0  | 6.0  |
| Sacramento-T        |       |      | 11 Dec 2018 to |        |      |      |      |
| Street 060670010, 3 | 21835 | 5.5  | 19 Jun 2020    | 3,316  | 0.78 | 1.9  | 6.4  |
| Sacramento-T        |       |      | 12 Dec 2018 to |        |      |      |      |
| Street 060670010, 3 | 21863 | 5.5  | 1 Aug 2020     | 3,887  | 0.70 | 2.5  | 7.3  |
| Sacramento-T        |       |      | 12 Dec 2018 to |        |      |      |      |
| Street 060670010, 3 | 21871 | 5.5  | 19 Jun 2020    | 3,314  | 0.79 | 2.2  | 6.2  |
| Sacramento-T        |       |      | 12 Dec 2018 to |        |      |      |      |
| Street 060670010, 3 | 21873 | 5.5  | 19 Jun 2020    | 3,389  | 0.78 | 2.7  | 7.2  |
| Sacramento-T        |       |      | 12 Dec 2018 to |        |      |      |      |
| Street 060670010, 3 | 21875 | 5.5  | 19 Jun 2020    | 3,448  | 0.78 | 2.1  | 6.7  |
| Sacramento-T        |       |      | 24 Apr 2020    |        |      |      |      |
| Street 060670010, 3 | 53637 | 10.2 | to 11 Dec 2020 | 2,389  | 0.87 | 8.3  | 17.3 |
| Sacramento-T        |       |      | 27 Apr 2020    |        |      |      |      |
| Street 060670010, 3 | 53769 | 9.0  | to 11 Dec 2020 | 2,378  | 0.91 | 7.7  | 14.0 |
| Sacramento-T        |       |      | 27 Apr 2020    |        |      |      |      |
| Street 060670010, 3 | 53777 | 15.8 | to 11 Dec 2020 | 2,323  | 0.89 | 12.2 | 21.0 |
| Sacramento-T        |       |      | 7 Jul 2020 to  |        |      |      |      |
| Street 060670010, 3 | 58715 | 6.1  | 20 Aug 2020    | 1,043  | 0.85 | 1.0  | 9.3  |
| Sacramento-T        |       |      | 14 Jun 2018 to |        |      |      |      |
| Street 060670010, 3 | 8246  | 1.4  | 11 Dec 2020    | 17,724 | 0.91 | 5.1  | 12.2 |
| Sacramento-T        |       |      | 9 Mar 2018 to  |        |      |      |      |
| Street 060670010, 3 | 8396  | 6.1  | 11 Dec 2020    | 20,709 | 0.91 | 5.2  | 13.1 |

|                     |       |      |                |        |      |     |      |
|---------------------|-------|------|----------------|--------|------|-----|------|
| Sacramento-T        |       |      | 9 Mar 2018 to  |        |      |     |      |
| Street 060670010, 3 | 8408  | 17.4 | 11 Dec 2020    | 20,293 | 0.78 | 4.1 | 9.7  |
| Sacramento-T        |       |      | 9 Mar 2018 to  |        |      |     |      |
| Street 060670010, 3 | 8414  | 2.1  | 11 Dec 2020    | 20,799 | 0.90 | 5.0 | 11.5 |
| Sacramento-T        |       |      | 9 Mar 2018 to  |        |      |     |      |
| Street 060670010, 3 | 8422  | 15.8 | 11 Dec 2020    | 20,958 | 0.90 | 5.0 | 12.0 |
| Sacramento-T        |       |      | 14 Sep 2019 to |        |      |     |      |
| Street 060670010, 3 | 8424  | 6.1  | 11 Dec 2020    | 9,574  | 0.86 | 5.5 | 12.0 |
| Sacramento-T        |       |      | 9 Mar 2018 to  |        |      |     |      |
| Street 060670010, 3 | 8432  | 2.1  | 28 Oct 2020    | 19,490 | 0.92 | 5.0 | 12.6 |
| Sacramento-T        |       |      | 2 Feb 2019 to  |        |      |     |      |
| Street 060670010, 3 | 8440  | 2.1  | 11 Dec 2020    | 14,797 | 0.86 | 4.2 | 10.2 |
| South Long Beach    |       |      | 12 Dec 2018 to |        |      |     |      |
| 060374004, 3        | 21893 | 18.9 | 1 Mar 2019     | 407    | 0.54 | 3.7 | 11.3 |
| South Long Beach    |       |      | 12 Dec 2018 to |        |      |     |      |
| 060374004, 3        | 21895 | 16.1 | 1 Mar 2019     | 360    | 0.76 | 3.6 | 7.9  |
| South Long Beach    |       |      | 12 Dec 2018 to |        |      |     |      |
| 060374004, 3        | 21897 | 15.3 | 1 Mar 2019     | 407    | 0.50 | 3.0 | 11.0 |
| South Long Beach    |       |      | 12 Dec 2018 to |        |      |     |      |
| 060374004, 3        | 21899 | 10.4 | 1 Mar 2019     | 410    | 0.48 | 3.0 | 11.2 |
| South Long Beach    |       |      | 12 Dec 2018 to |        |      |     |      |
| 060374004, 3        | 21901 | 17.4 | 11 Mar 2019    | 456    | 0.48 | 3.5 | 10.7 |
| South Long Beach    |       |      | 12 Dec 2018 to |        |      |     |      |
| 060374004, 3        | 21907 | 16.6 | 1 Mar 2019     | 408    | 0.55 | 2.9 | 10.5 |
| South Long Beach    |       |      | 12 Dec 2018 to |        |      |     |      |
| 060374004, 3        | 21909 | 18.3 | 1 Mar 2019     | 403    | 0.51 | 3.2 | 11.4 |
| South Long Beach    |       |      | 12 Dec 2018 to |        |      |     |      |
| 060374004, 3        | 21919 | 18.4 | 1 Mar 2019     | 407    | 0.74 | 3.1 | 7.9  |
| South Long Beach    |       |      | 12 Dec 2018 to |        |      |     |      |
| 060374004, 3        | 21921 | 7.8  | 1 Mar 2019     | 406    | 0.53 | 3.0 | 11.0 |
| South Long Beach    |       |      | 12 Dec 2018 to |        |      |     |      |
| 060374004, 3        | 21937 | 13.6 | 1 Mar 2019     | 408    | 0.70 | 2.9 | 7.9  |
| South Long Beach    |       |      | 12 Dec 2018 to |        |      |     |      |
| 060374004, 3        | 21951 | 16.8 | 1 Mar 2019     | 407    | 0.68 | 3.3 | 9.0  |
| South Long Beach    |       |      | 12 Dec 2018 to |        |      |     |      |
| 060374004, 3        | 21955 | 17.4 | 1 Mar 2019     | 408    | 0.44 | 3.8 | 13.3 |
| South Long Beach    |       |      | 12 Dec 2018 to |        |      |     |      |
| 060374004, 3        | 21959 | 16.1 | 1 Mar 2019     | 407    | 0.51 | 3.3 | 11.1 |
| South Long Beach    |       |      | 12 Dec 2018 to |        |      |     |      |
| 060374004, 3        | 21971 | 15.3 | 1 Mar 2019     | 408    | 0.46 | 3.3 | 12.1 |
| South Long Beach    |       |      | 12 Dec 2018 to |        |      |     |      |
| 060374004, 3        | 21975 | 14.4 | 1 Mar 2019     | 405    | 0.43 | 3.4 | 13.0 |
| South Long Beach    |       |      | 12 Dec 2018 to |        |      |     |      |
| 060374004, 3        | 21979 | 15.2 | 1 Mar 2019     | 405    | 0.51 | 2.7 | 10.9 |

|                  |       |     |                |        |      |      |      |
|------------------|-------|-----|----------------|--------|------|------|------|
| 060374004, 3     |       |     | 1 Mar 2019     |        |      |      |      |
| South Long Beach |       |     | 31 Jan 2018 to |        |      |      |      |
| 060374004, 3     | 6848  | 6.9 | 16 Mar 2019    | 3,094  | 0.62 | -1.4 | 5.2  |
| Yosemite Village |       |     | 28 Aug 2020    |        |      |      |      |
| 060431001, 3     | 50601 | 6.9 | to 30 Jun 2022 | 10,290 | 0.92 | -0.8 | 13.5 |

---
